# Supplementary material for: FCoV Viral Sequences of Systemically Infected Healthy Cats Lack Gene Mutations Previously Linked to the Development of FIP
Source: MDPI journal article supplement (doi:10.3390/pathogens9080603), 2020-07-24
Supplement: s1 [file s1]

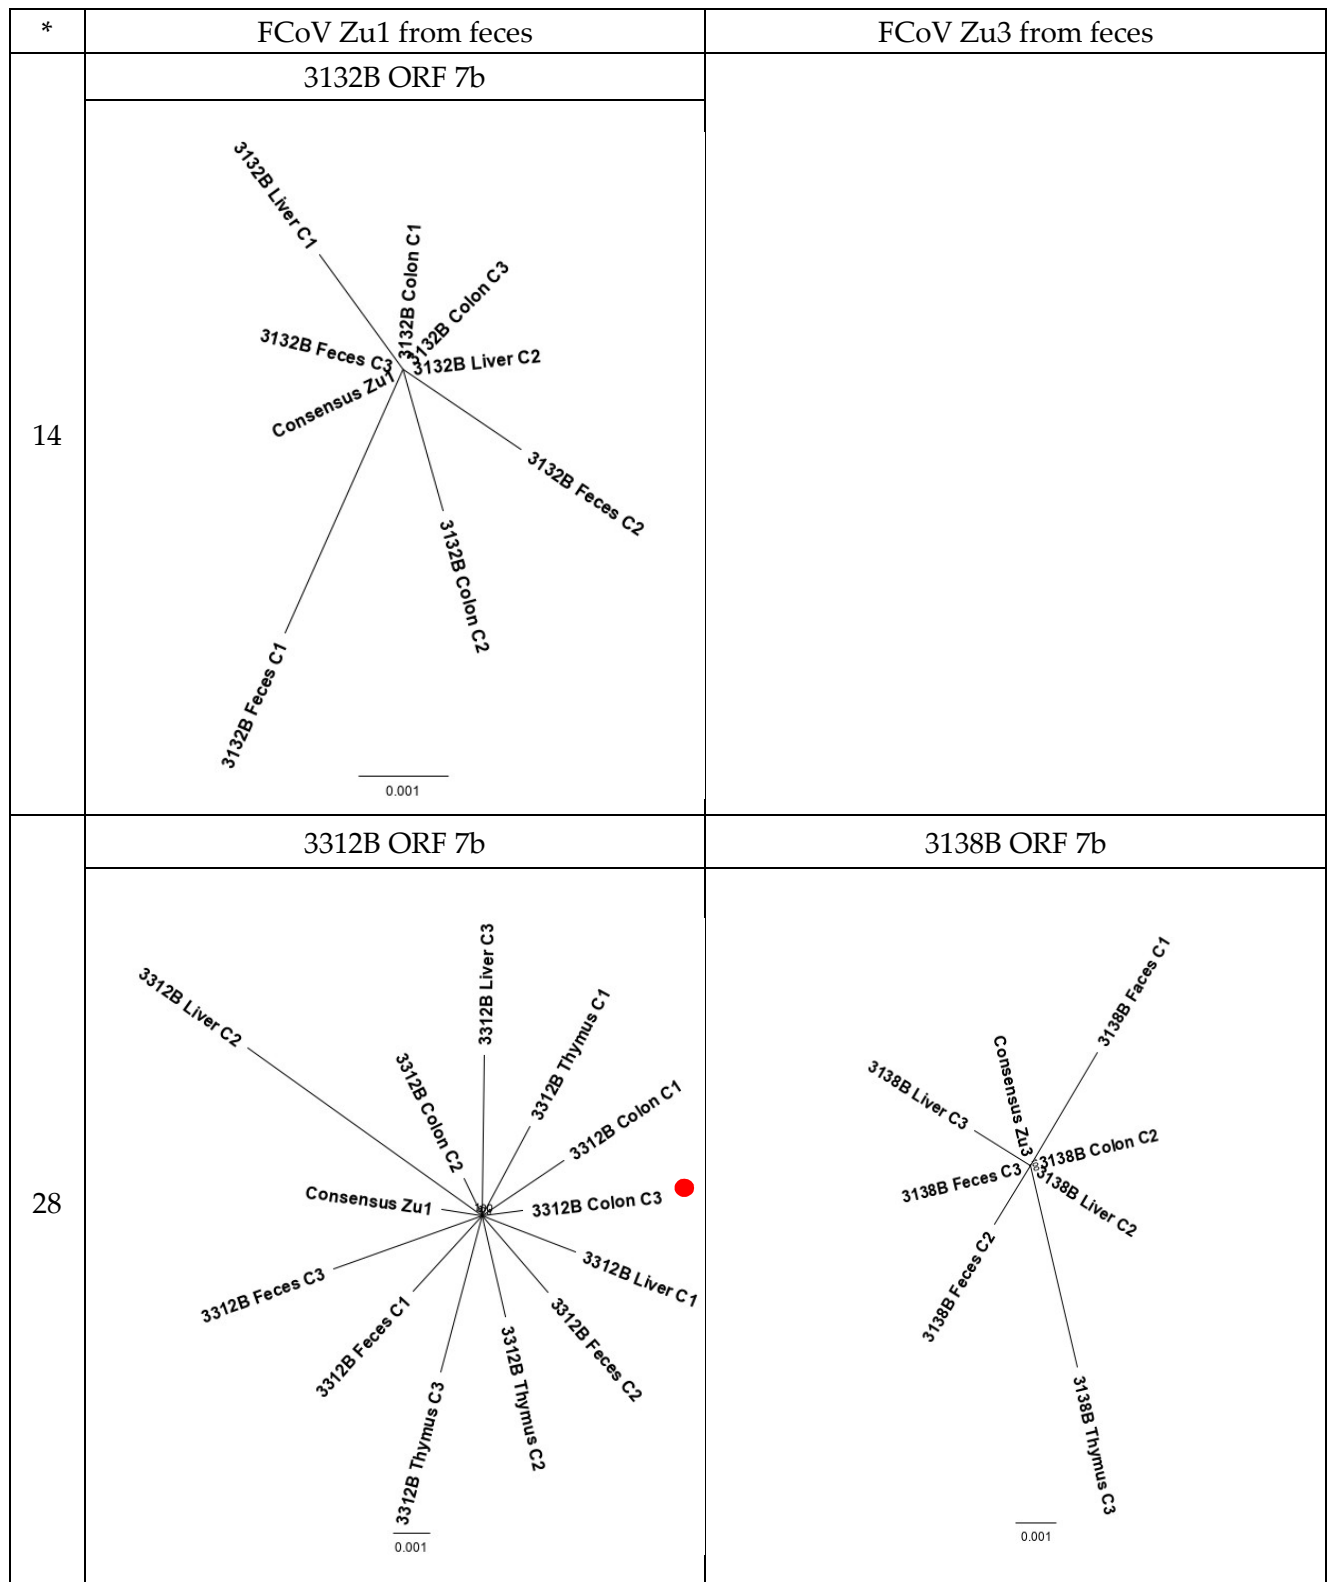

**Figure S3.** Phylogenetic analysis based on the sequences encoding for nonstructural protein 7b for cats 3132B, 3138B, and 3312B. (\*, day p.i. of euthanasia; red dot, sequence carries a deletion that leads to a premature stop codon; bar, mean number of differences per 1000 sites).
