# Supplementary figures and images for: FCoV Viral Sequences of Systemically Infected Healthy Cats Lack Gene Mutations Previously Linked to the Development of FIP
Source: MDPI journal article supplement (doi:10.3390/pathogens9080603), 2020-07-24

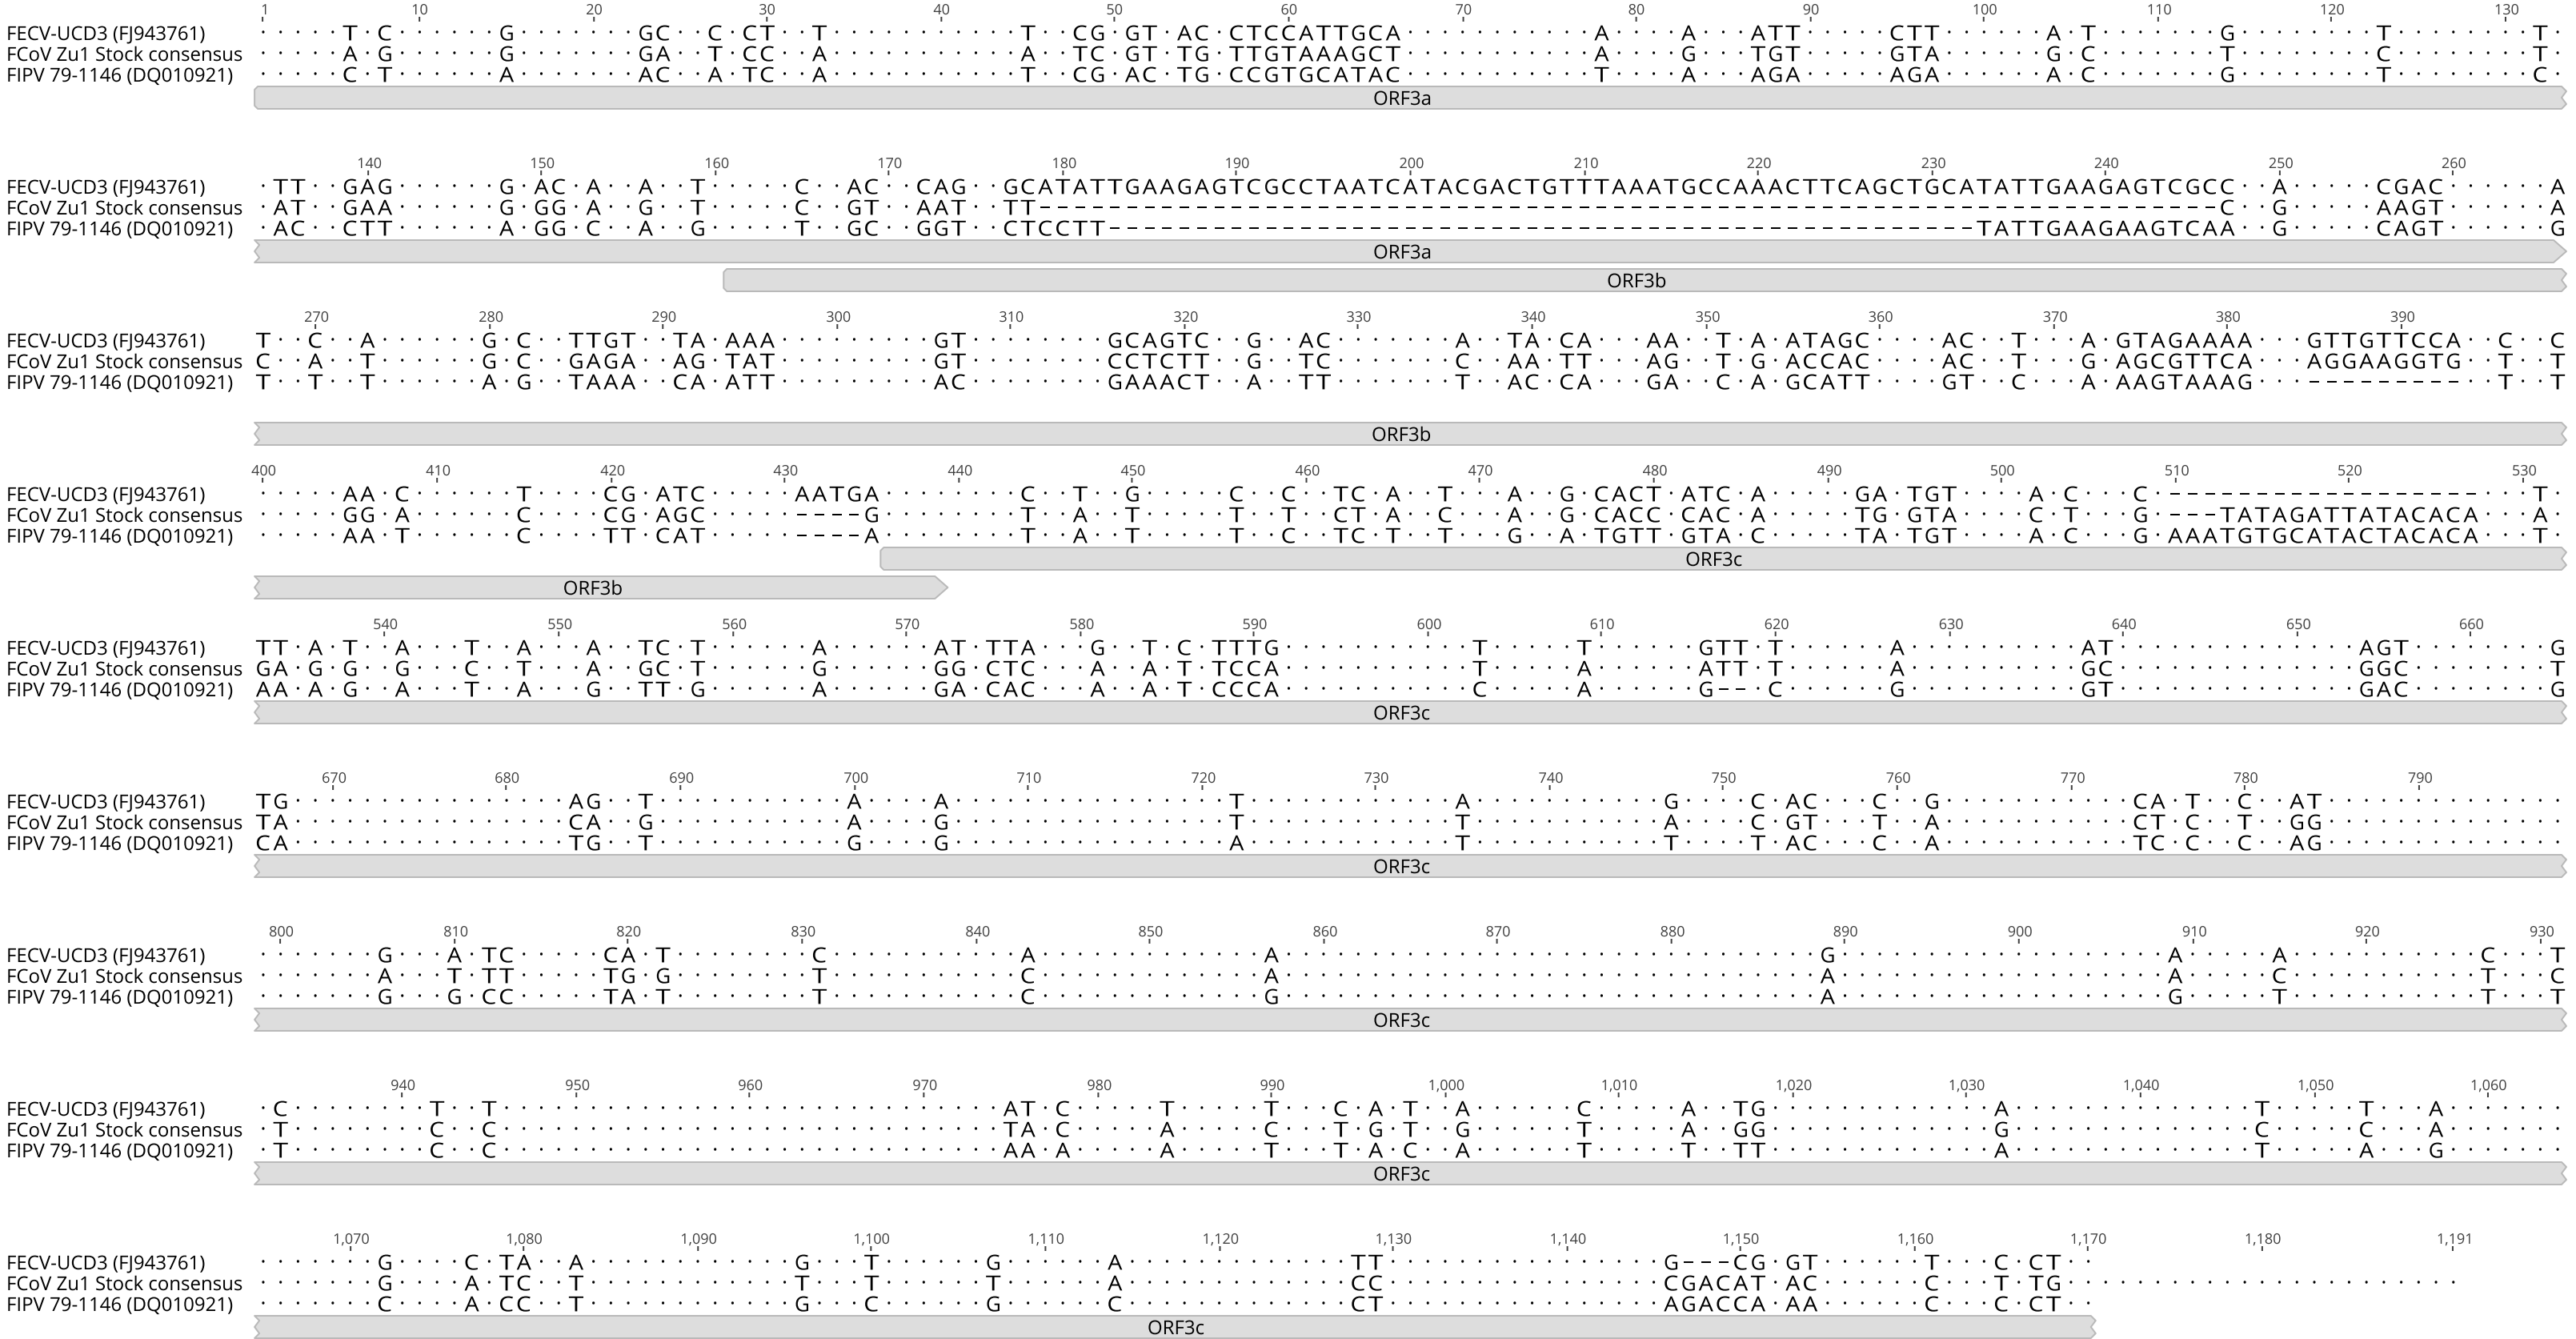

Supplement: s1 [file s1]
